# Supplementary material for: Enhanced surface reconstruction of V-doped Ni3N driven by strong OH adsorption to boost 5-hydroxymethylfurfural electrooxidation for energy-saving H2 production
Source: Royal Society of Chemistry journal article supplement (doi:10.1039/d4ta01543f), 2024-01-01
Supplement: d4ta01543f1.pdf [file d4ta01543f1.pdf]

Supporting Information for

## Enhanced surface reconstruction of V-Doped Ni<sub>3</sub>N driven by strong OH adsorption to boost 5-hydroxymethylfurfural electrooxidation for energy-saving H<sub>2</sub> production

Qi Zhou, Juan Wang, Ga Jin, Huiling Liu\*, Cheng Wang

*Institute for New Energy Materials and Low-Carbon Technologies, School of Materials Science and Engineering, Tianjin Key Laboratory of Advanced Functional Porous Materials, Tianjin University of Technology, Tianjin, 300384, China*

**Description:** There are 16 pages in the Supporting Information, including 26 figures and 2 tables.

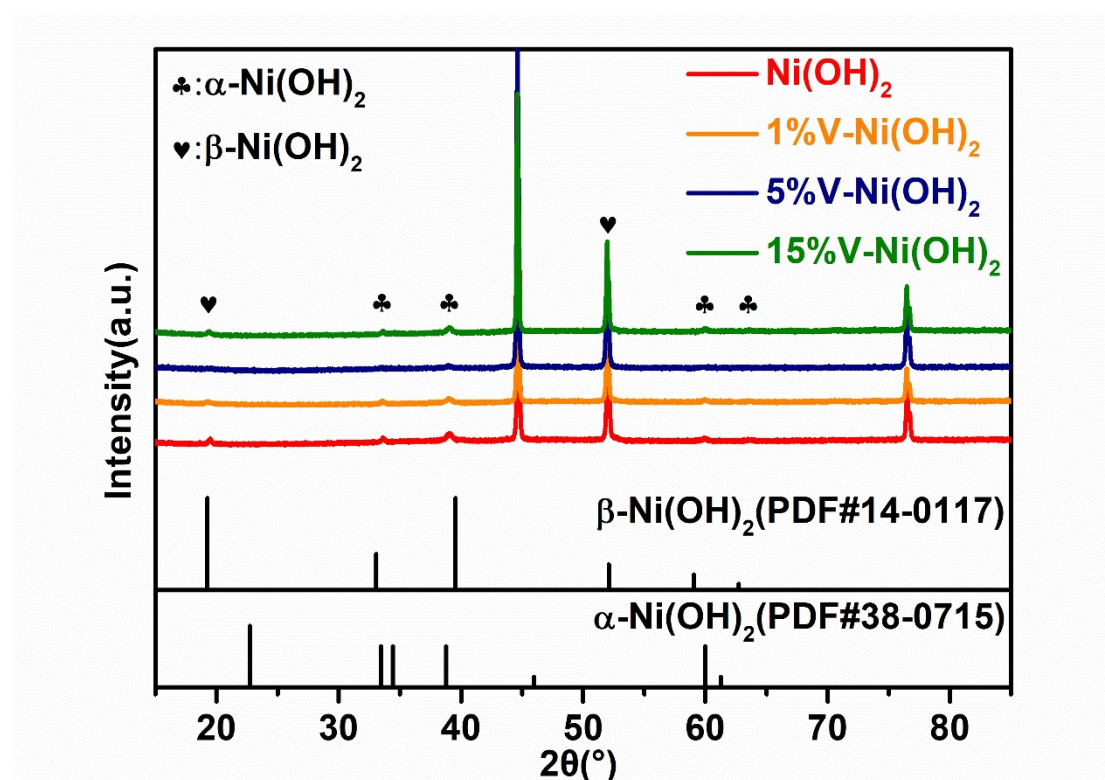

**Fig. S1** XRD patterns of the Ni(OH)<sub>2</sub>, 1%V-, 5%V- and 15%V-Ni(OH)<sub>2</sub>.

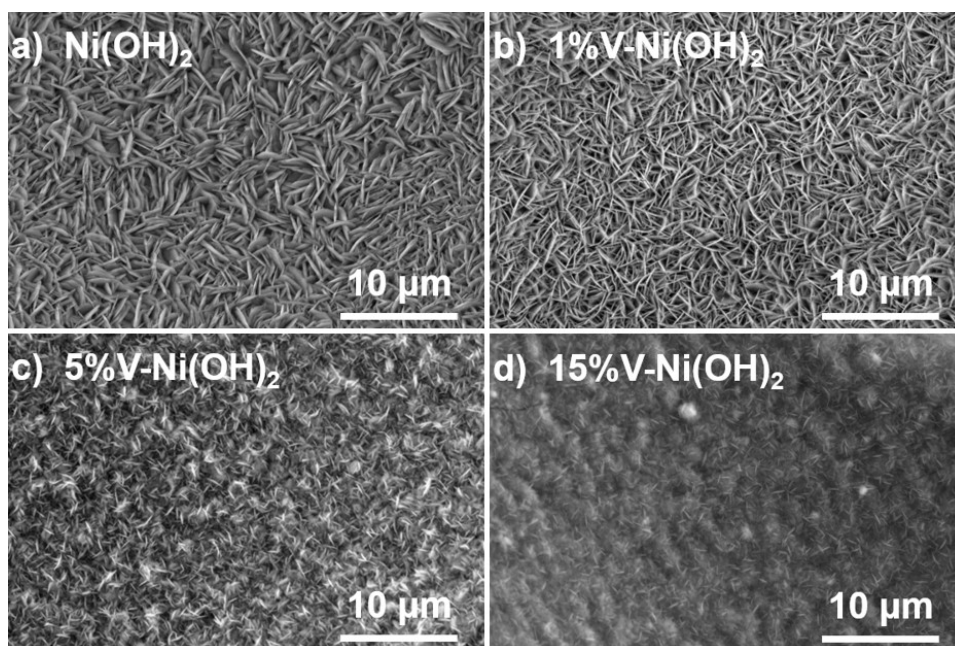

**Fig. S2** SEM images of (a)  $\text{Ni(OH)}_2$ , (b) 1%V- $\text{Ni(OH)}_2$ , (c) 5%V- $\text{Ni(OH)}_2$  and (d) 15%V- $\text{Ni(OH)}_2$ .

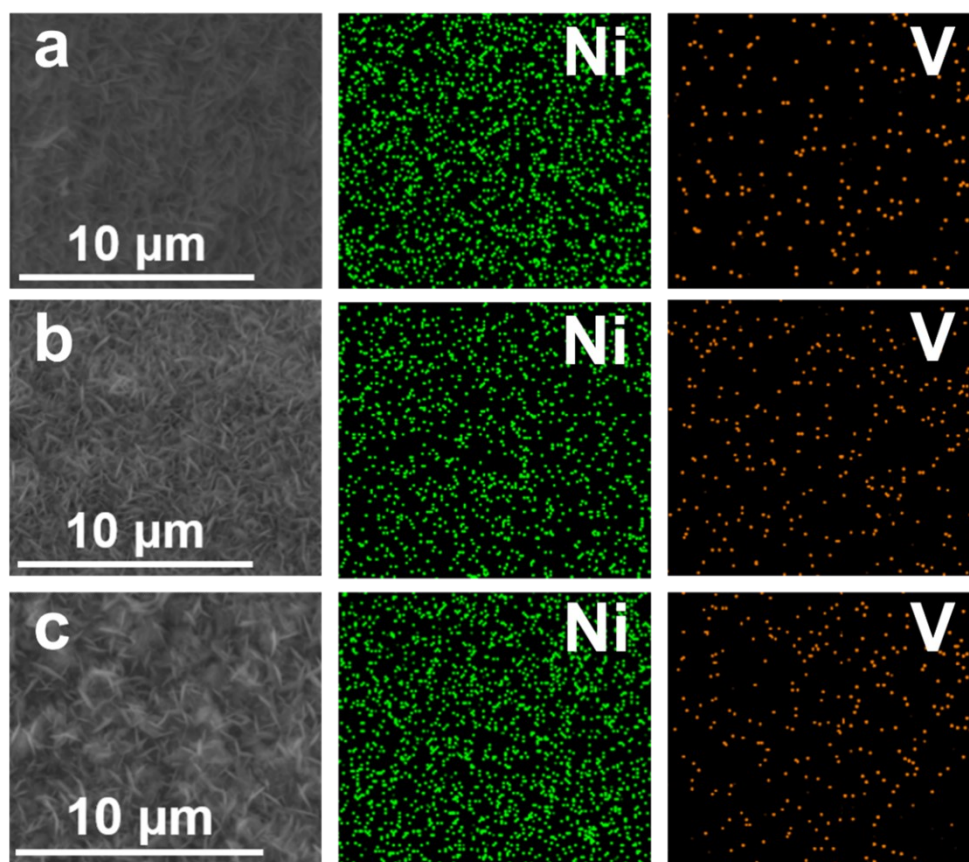

**Fig. S3** Elemental mapping images of Ni and V for (a) 1%V- $\text{Ni(OH)}_2$ , (b) 5%V- $\text{Ni(OH)}_2$  and (c) 15%V- $\text{Ni(OH)}_2$ .

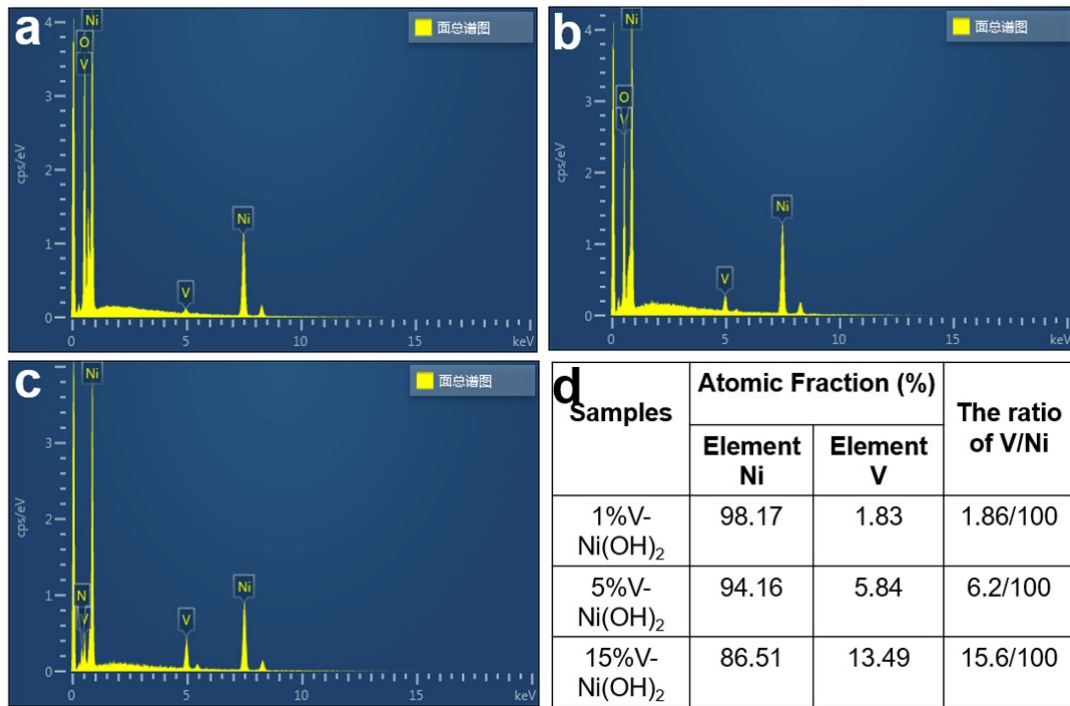

**Fig. S4** EDX spectra of (a) 1%V-Ni(OH)<sub>2</sub>, (b) 5%V-Ni(OH)<sub>2</sub> and (c) 15%V-Ni(OH)<sub>2</sub>.

(d) Corresponding atomic ratios of V to Ni for different samples.

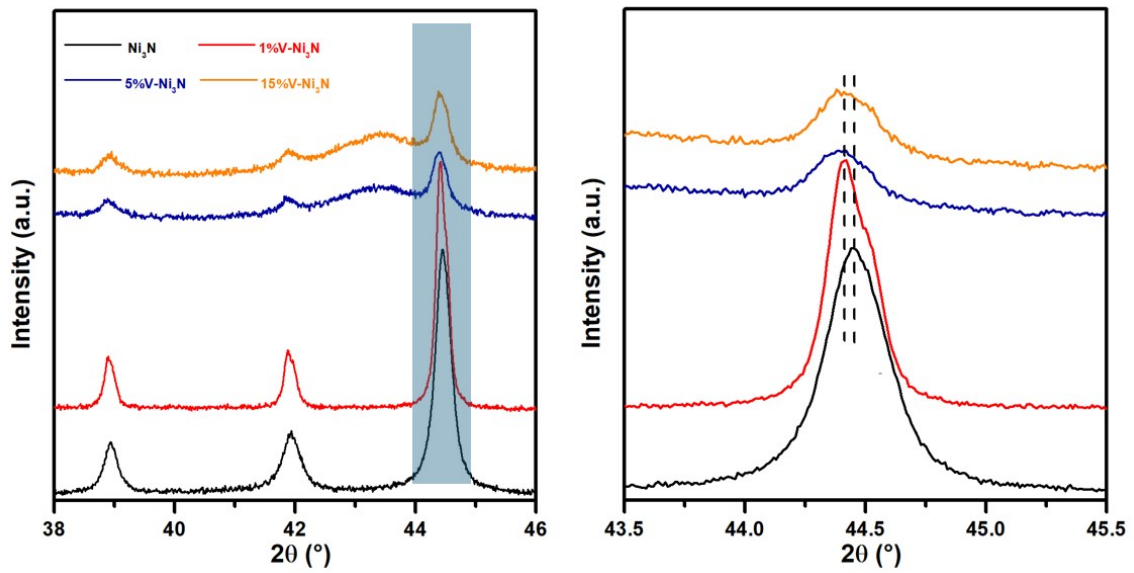

**Fig. S5** XRD patterns of the Ni<sub>3</sub>N and 1%, 5%, 15%V-Ni<sub>3</sub>N powder samples.

| <b>Samples</b>         | <b>Atomic Fraction (%)</b> |                  | <b>The ratio of V/Ni</b> |
|------------------------|----------------------------|------------------|--------------------------|
|                        | <b>Element Ni</b>          | <b>Element V</b> |                          |
| 1%V-Ni <sub>3</sub> N  | 99.5                       | 0.5              | 0.50/100                 |
| 5%V-Ni <sub>3</sub> N  | 94.0                       | 6.0              | 6.38/100                 |
| 15%V-Ni <sub>3</sub> N | 84.4                       | 15.6             | 18.48/100                |

**Fig. S6** The atomic ratios of V to Ni for different samples determined by EDX.

| <b>Samples</b>              | <b>Atomic Fraction (%)</b> |                  | <b>The ratio of V/Ni</b> |
|-----------------------------|----------------------------|------------------|--------------------------|
|                             | <b>Element Ni</b>          | <b>Element V</b> |                          |
| <b>1%V-Ni<sub>3</sub>N</b>  | 99.2                       | 0.8              | 0.80/100                 |
| <b>5%V-Ni<sub>3</sub>N</b>  | 93.9                       | 6.1              | 6.51/100                 |
| <b>15%V-Ni<sub>3</sub>N</b> | 82.9                       | 17.1             | 20.51/100                |

**Fig. S7** The atomic ratios of V to Ni for different samples determined by ICP.

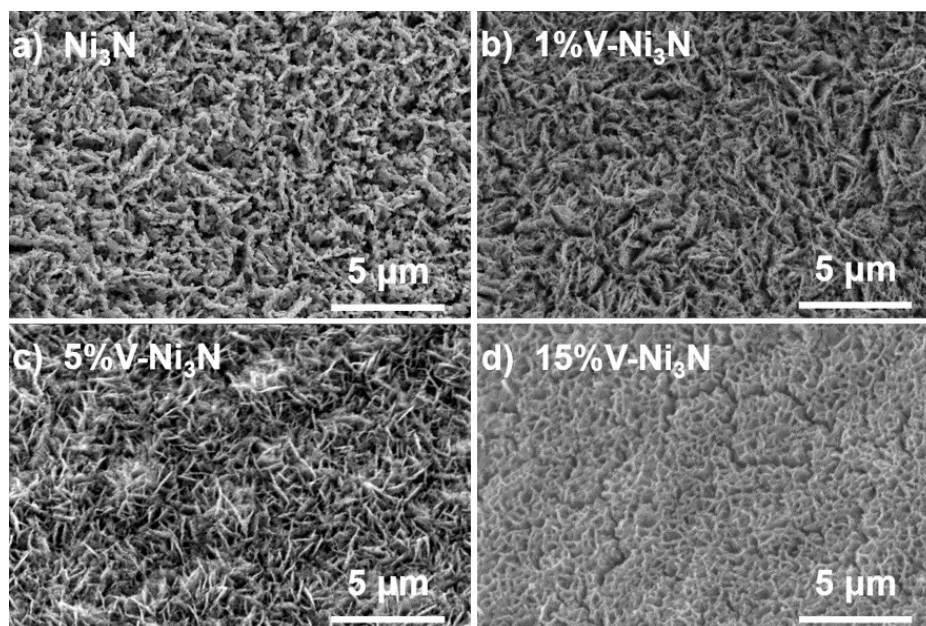

**Fig. S8** SEM images of (a)  $\text{Ni}_3\text{N}$ , (b) 1%V- $\text{Ni}_3\text{N}$ , (c) 5%V- $\text{Ni}_3\text{N}$  and (d) 15%V- $\text{Ni}_3\text{N}$ .

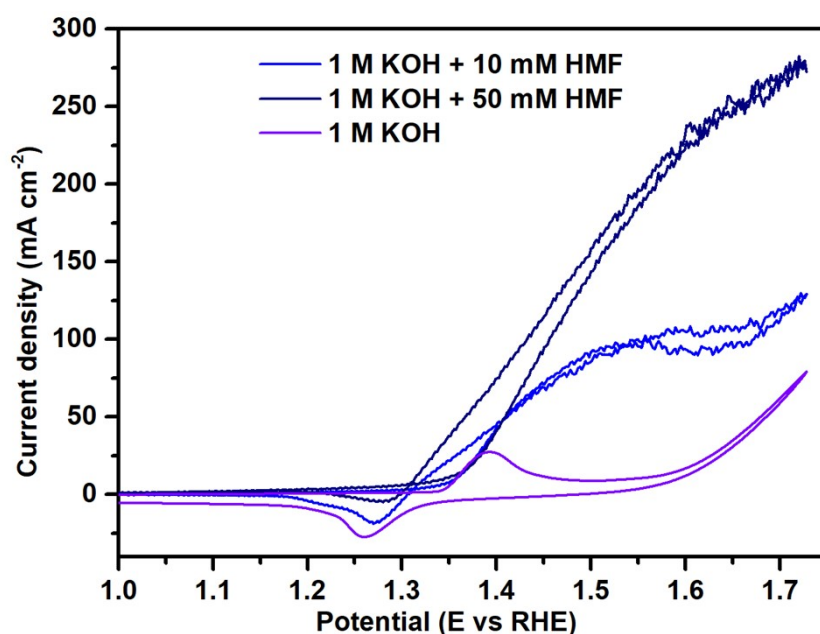

**Fig. S9** CV curves of the 5%V- $\text{Ni}_3\text{N}$  in 1.0 M KOH with and without 10/50 mM HMF at a scan rate of 10 mV s<sup>-1</sup>. In 1.0 M KOH without HMF, the redox peaks are ascribed to the redox between  $\text{Ni}^{2+}$  and  $\text{Ni}^{3+}$ . The increase in current after 1.6 V is due to the start of oxygen evolution reaction. In the presence of 10 mM HMF, the anodic current starts to increase at the same position (1.35 V) with that in the purple line, indicating the oxidation of  $\text{Ni}^{2+}$  to  $\text{Ni}^{3+}$ . Then the current rapidly increases as the oxidation reaction of HMF. At around 1.55-1.65 V, the current shows a slight decrease because of the consumption of HMF. The decrease in the current is avoided when the HMF concentration is 50 mM (black line). The following increase in the current after 1.65 V is due to the competed OER. During cathodic sweep, the peak belongs to the reduction of  $\text{Ni}^{3+}$  to  $\text{Ni}^{2+}$ .

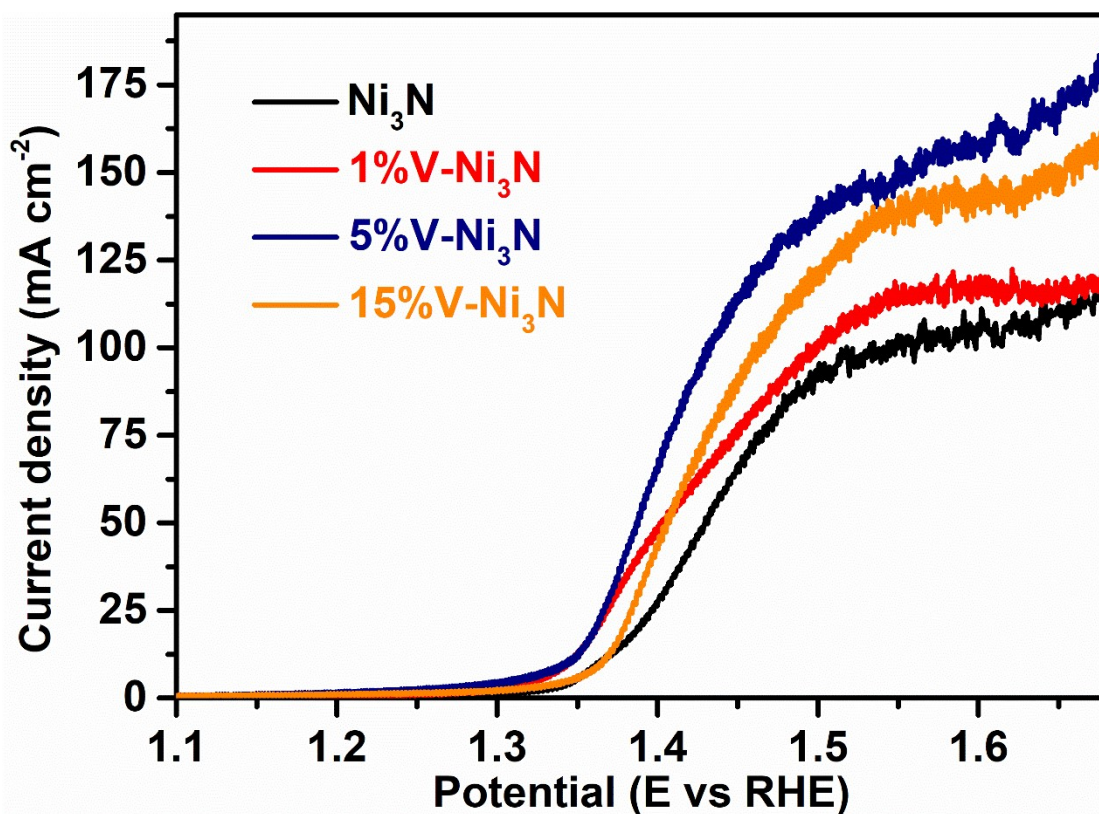

Fig. S10 LSV curves of HMFOR on V-Ni<sub>3</sub>N with different doping ratios.

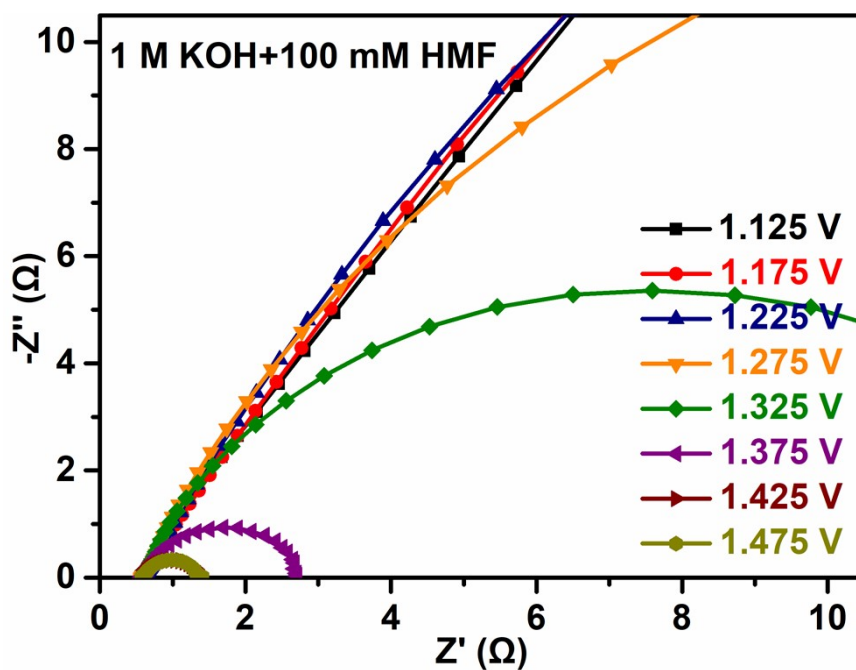

Fig. S11 In situ Nyquist plots of the Ni<sub>3</sub>N for HMFOR.

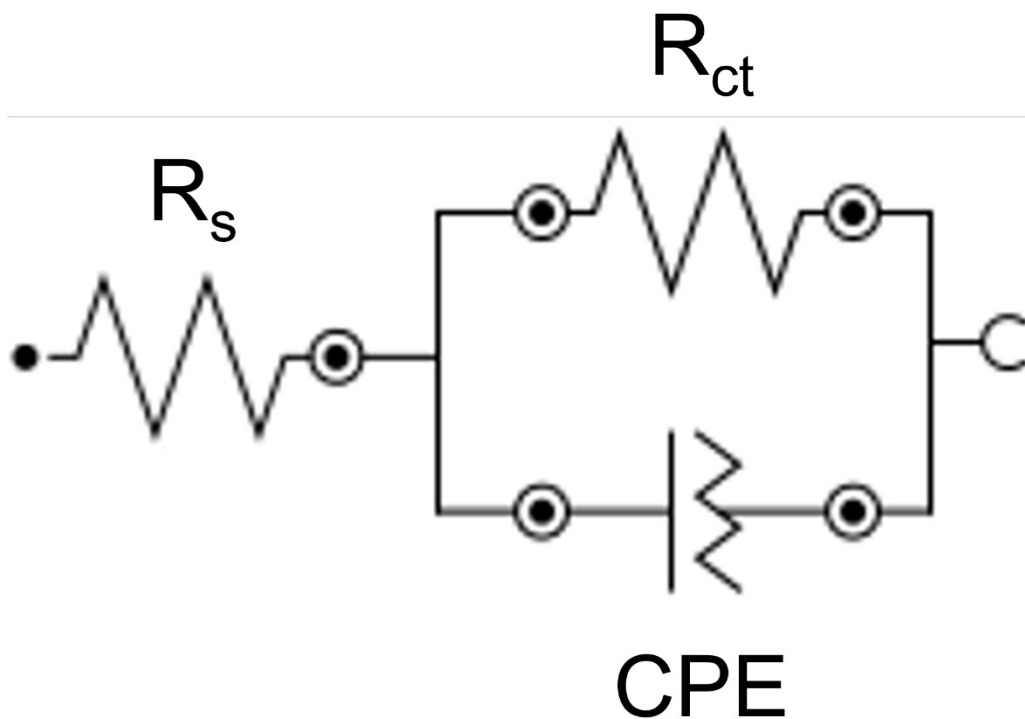

**Fig. S12** The corresponding equivalent circuit diagram consisting of an electrolyte resistance ( $R_s$ ), a charge transfer resistance ( $R_{ct}$ ), and a constant phase element (CPE).

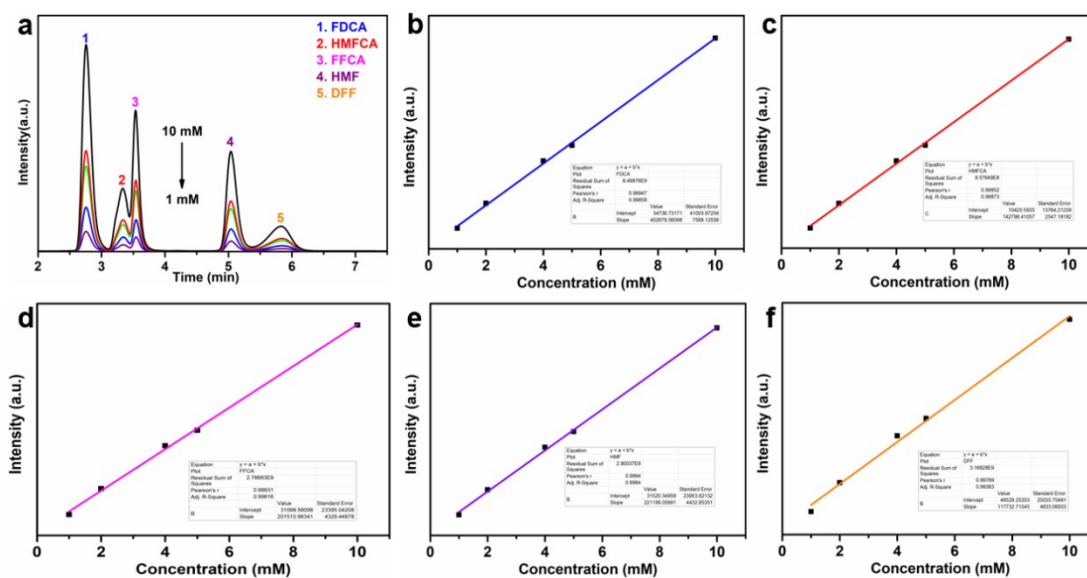

**Fig. S13** (a) Reference HPLC spectra, and calibration curves for (b) FDCA, (c) HMFCFA, (d) FFCA, (e) HMF, and (f) DFF.

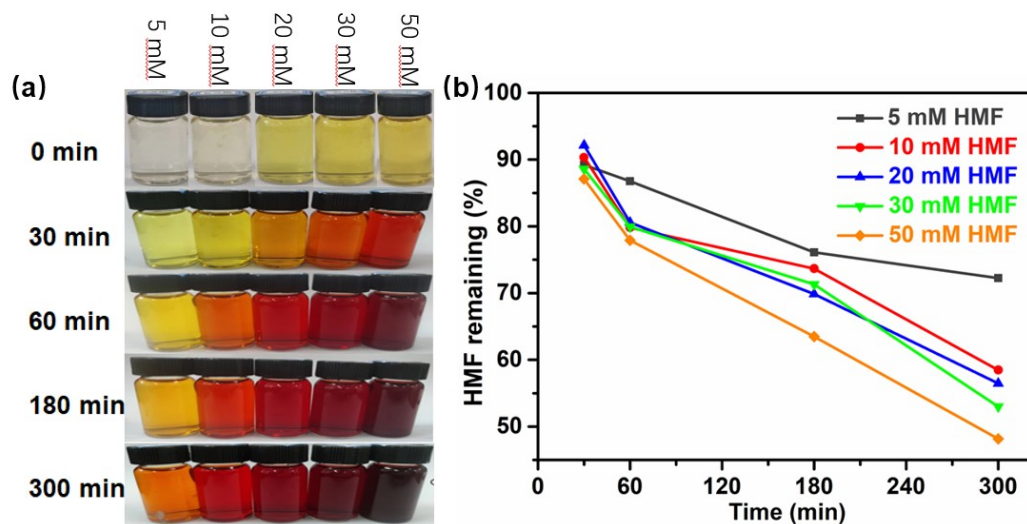

**Fig. S14** (a) Photographs of 1 M KOH with 5/10/20/30/50 mM HMF under different standing time. (b) HMF remaining (%) determined by HPLC.

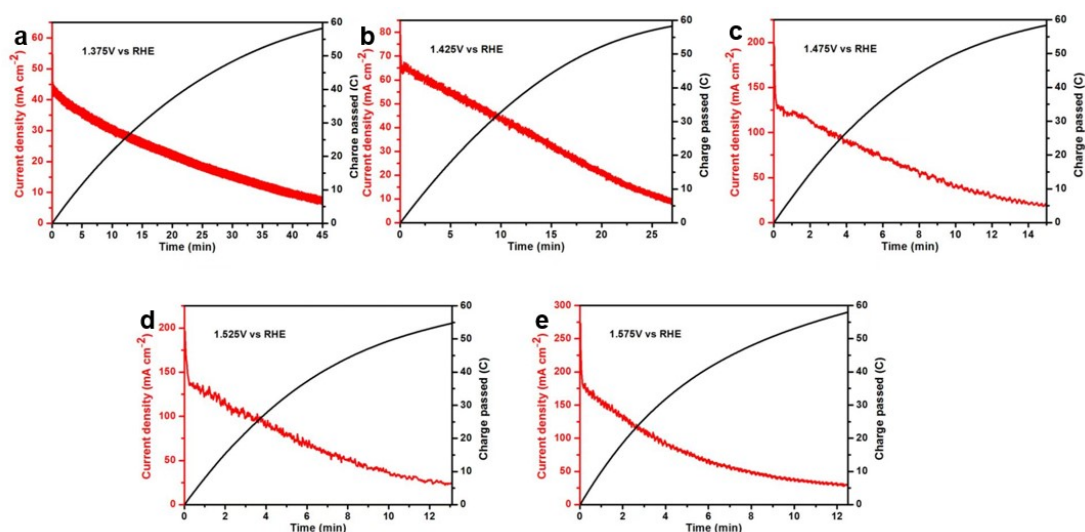

**Fig. S15** The current density and charge versus electrooxidation time at (a) 1.375 V, (b) 1.425 V, (c) 1.475 V, (d) 1.525 V, (e) 1.575 V.



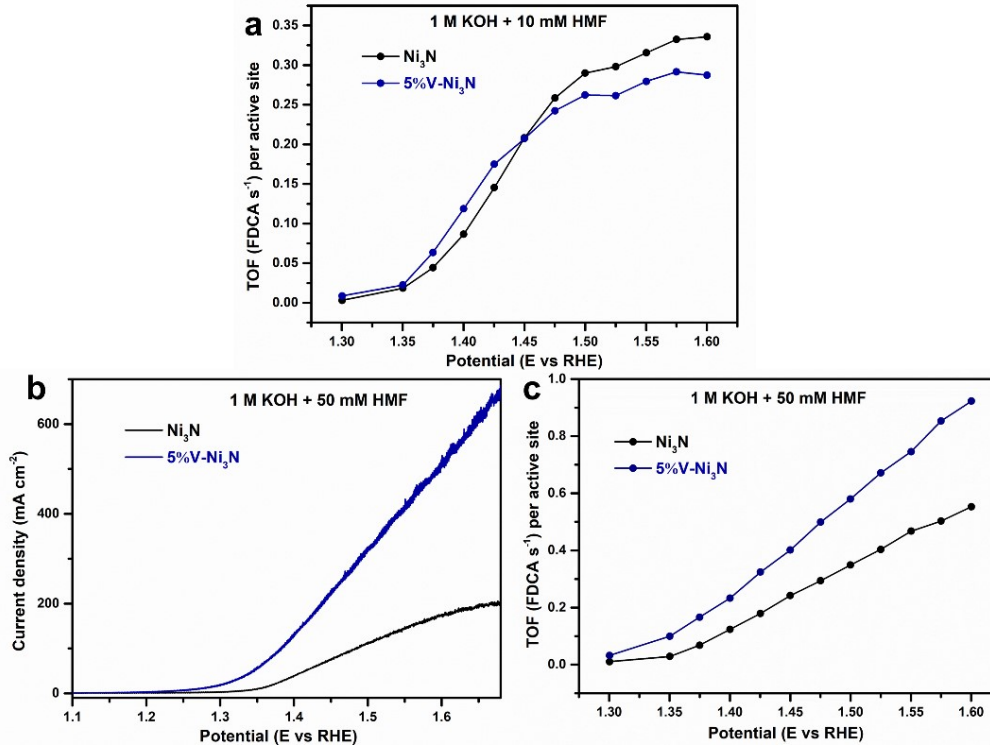

**Fig. S16** (a) TOFs of Ni<sub>3</sub>N and 5%V-Ni<sub>3</sub>N for HFMOR with 10 mM HMF at different applied potentials. (b) LSV curves of Ni<sub>3</sub>N and 5%V-Ni<sub>3</sub>N for HFMOR with 50 mM HMF. (c) TOFs of Ni<sub>3</sub>N and 5%V-Ni<sub>3</sub>N for HFMOR with 10 mM HMF at different applied potentials.

The TOFs for HMFOR and HER were calculated according to the equations below:

$$TOF = \frac{\text{total product turn overs} / \text{cm}^2 \text{ geometric area}}{\text{activesites} / \text{cm}^2 \text{ geometric area}}$$

*Product(FDCA)*

$$\begin{aligned}
 &= \left( j \frac{\text{mA}}{\text{cm}^2} \right) \left( \frac{1 \text{ C s}^{-1}}{1000 \text{ mA}} \right) \left( \frac{1 \text{ mol e}^-}{96485 \text{ C}} \right) \left( \frac{1 \text{ mol FDCA}}{6 \text{ mol e}^-} \right) \left( \frac{6.022 \times 10^{23} \text{ FDCA}}{1 \text{ mol FDCA}} \right) \\
 &= 1.04 \times 10^{15} \frac{\text{FDCA}}{\text{cm}^2 \text{ s}} \text{ per } \frac{\text{mA}}{\text{cm}^2}
 \end{aligned}$$

*Product(H<sub>2</sub>)*

$$\begin{aligned}
 &= \left( j \frac{\text{mA}}{\text{cm}^2} \right) \left( \frac{1 \text{ C s}^{-1}}{1000 \text{ mA}} \right) \left( \frac{1 \text{ mol e}^-}{96485 \text{ C}} \right) \left( \frac{1 \text{ mol H}_2}{2 \text{ mol e}^-} \right) \left( \frac{6.022 \times 10^{23} \text{ H}_2 \text{ mol}}{1 \text{ mol H}_2} \right) \\
 &= 3.12 \times 10^{15} \frac{\text{H}_2}{\text{cm}^2 \text{ s}} \text{ per } \frac{\text{mA}}{\text{cm}^2}
 \end{aligned}$$

$$activesites = \left( \frac{\text{number of atoms/ unit cell}}{\text{volume/ unit cell}} \right)^{\frac{2}{3}}$$

$$A_{ECSA}^{Ni_3N} = \frac{Cdl_{Ni_3N}}{Cs}$$

$$A_{ECSA}^{NiOOH} = \frac{Cdl_{NiOOH}}{Cs}$$

The plot of current density can be converted into a TOF plot according to:

$$TOF_{FDCA} = \frac{1.04 \times 10^{15} \frac{FDCA}{cm^2} \frac{mA}{cm^2} \times |j|}{activesites \times A_{ECSA}}$$

$$TOF_{H_2} = \frac{3.12 \times 10^{15} \frac{H_2}{cm^2} \frac{mA}{cm^2} \times |j|}{activesites \times A_{ECSA}}$$

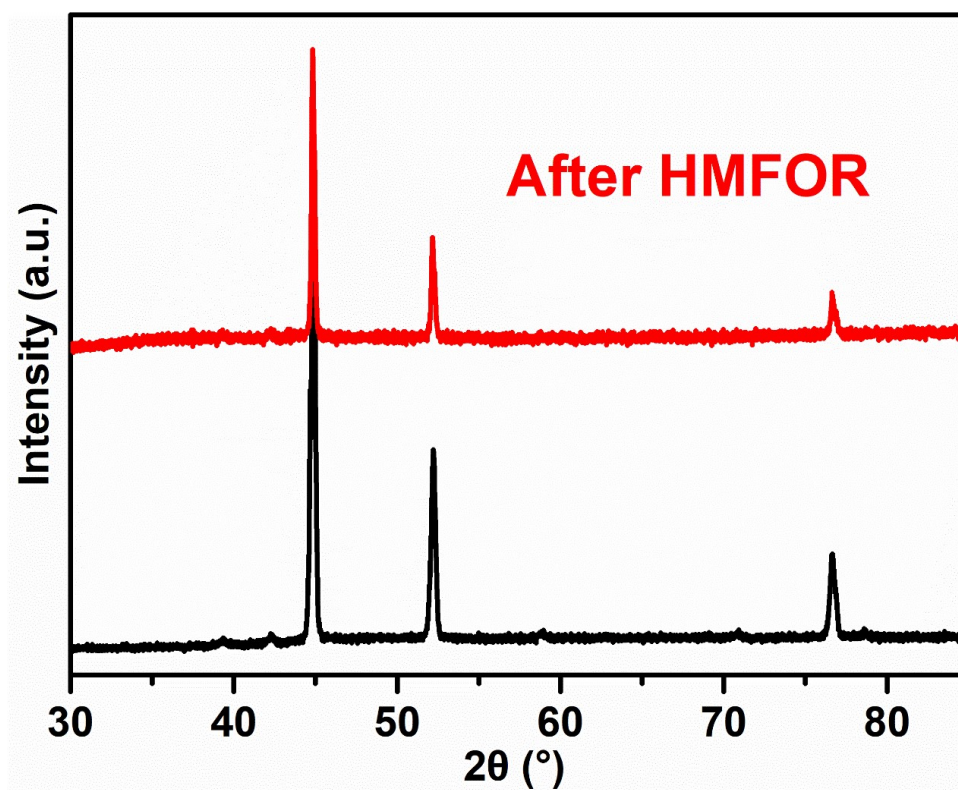

Fig. S17 XRD patterns of 5%V-Ni<sub>3</sub>N before and after HMFOR.

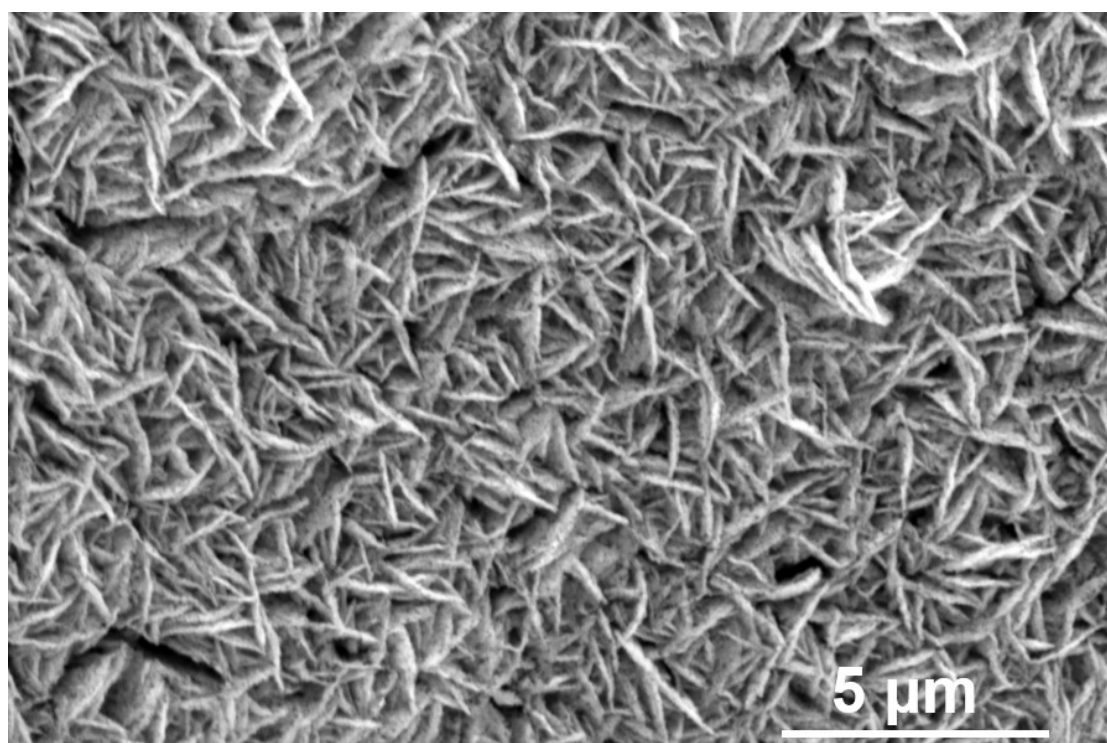

Fig. S18 SEM image of 5%V-Ni<sub>3</sub>N after HMFOR.

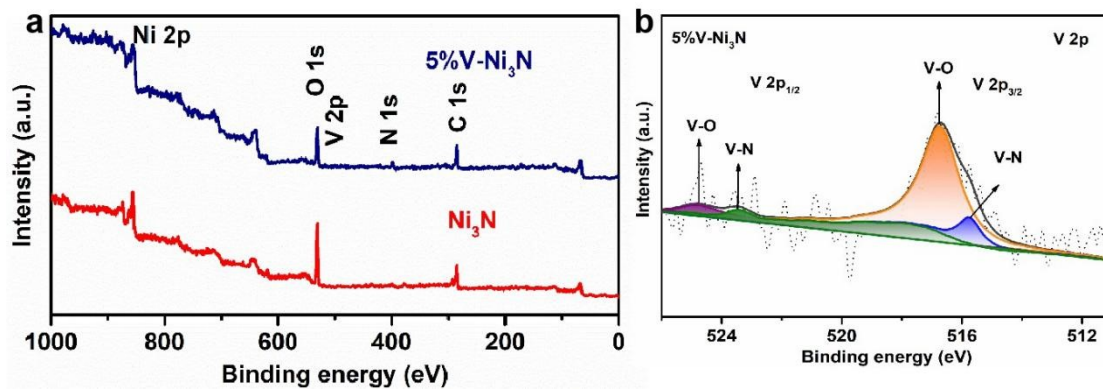

**Fig. S19** (a) Survey XPS spectra of  $\text{Ni}_3\text{N}$  and  $5\%\text{V-Ni}_3\text{N}$ . (b) V 2p XPS spectra of  $5\%\text{V-Ni}_3\text{N}$  before and after HMFOR.

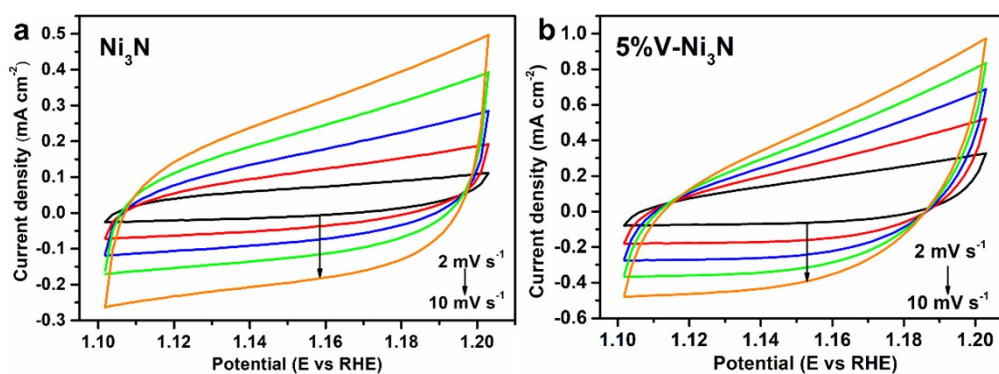

**Fig. S20** CV curves of (a)  $\text{Ni}_3\text{N}$  and (b)  $5\%\text{V-Ni}_3\text{N}$  in 1 M KOH at different scan rates.

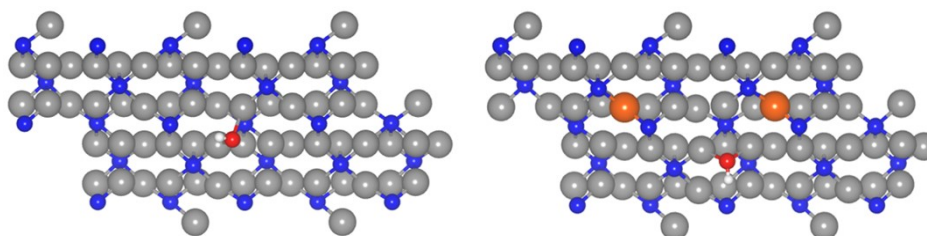

Gray: Ni, orange: V, blue: N, red: O, white: H

**Fig. S21** DFT-optimized models of OH adsorption on  $\text{Ni}_3\text{N}$  and  $5\%\text{V-Ni}_3\text{N}$ .

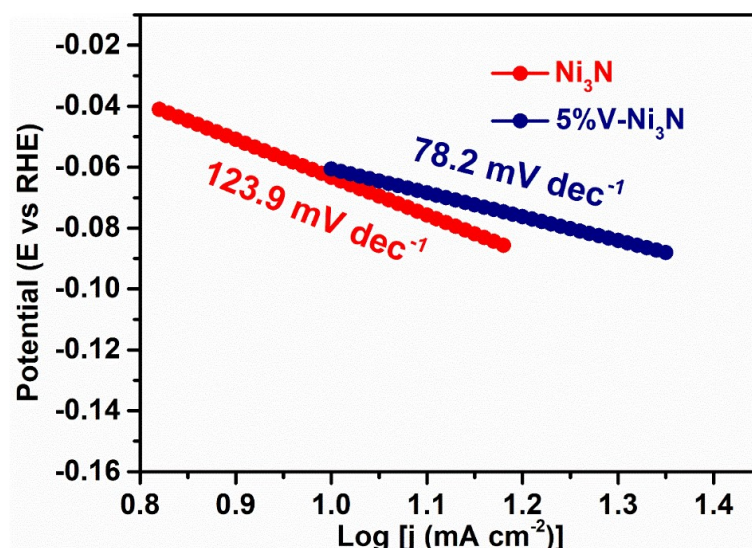

Fig. S22 Tafel slopes of the HER processes on the 5%V-Ni<sub>3</sub>N and Ni<sub>3</sub>N.

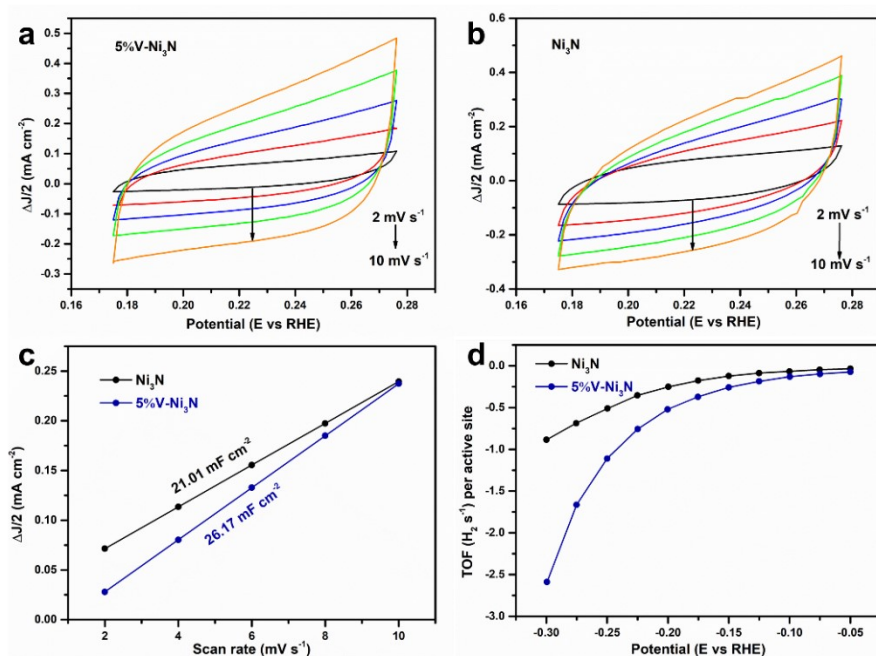

Fig. S23 CV curves of (a) 5%V-Ni<sub>3</sub>N and (b) Ni<sub>3</sub>N in 1.0 M KOH with different scanning rates. (c)  $C_{dl}$  of Ni<sub>3</sub>N and 5%V-Ni<sub>3</sub>N. (d) TOFs of Ni<sub>3</sub>N and 5%V-Ni<sub>3</sub>N for HER in 1.0 M KOH at different applied potentials.

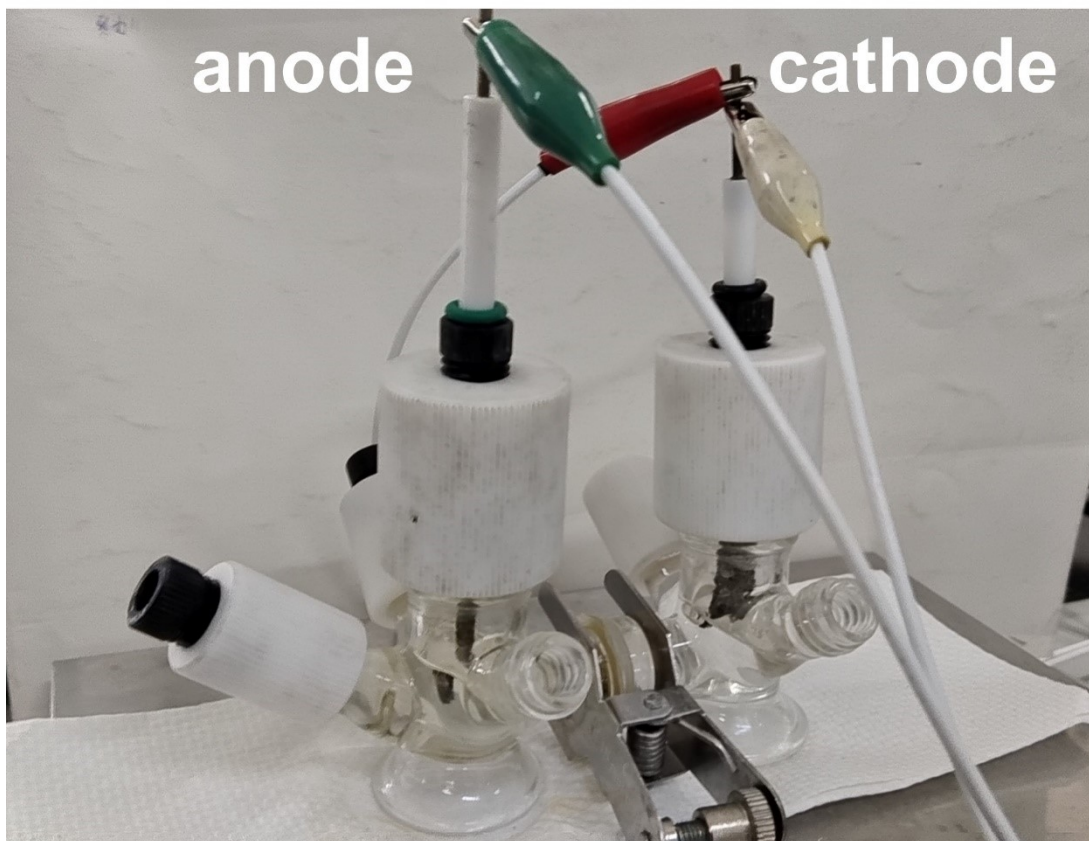

**Fig. S24** Device diagram of HMFOR coupled with HER.

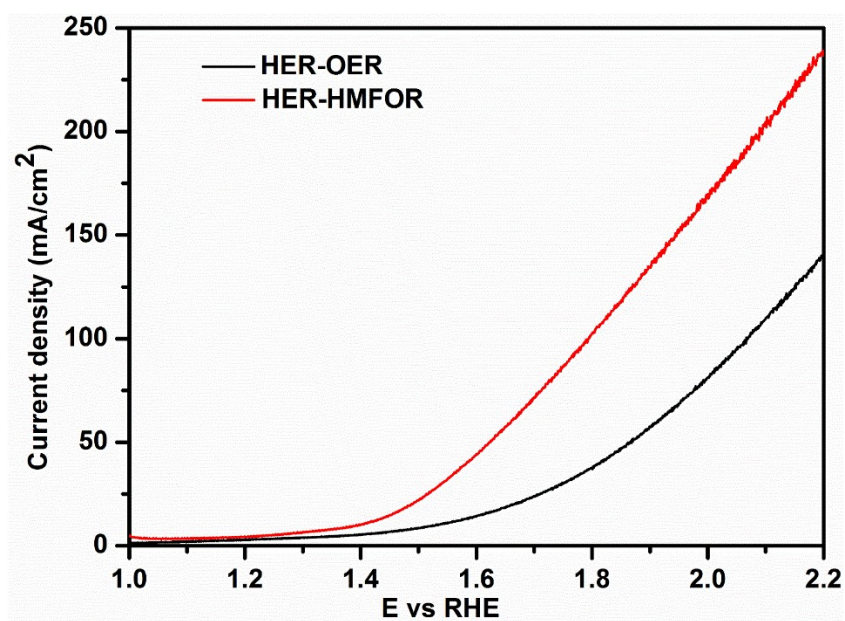

**Fig. S25** LSV curves for HMFOR-HER and OER-HER with the 5%V-Ni<sub>3</sub>N serving as both the anode and cathode in 1 M KOH with and without 100 mM HMF.

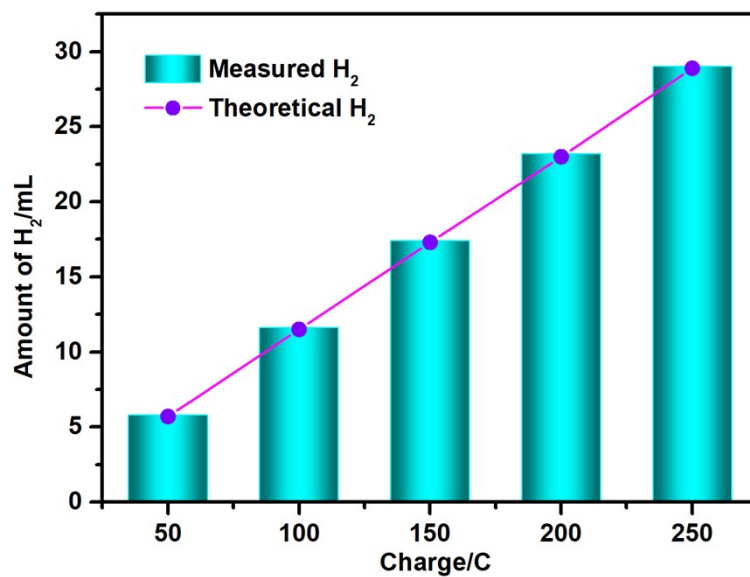

**Fig. S26** Amounts of H<sub>2</sub> produced in the continuous HMFOR-HER system with 5%V-Ni<sub>3</sub>N as the electrodes at different passing charge.

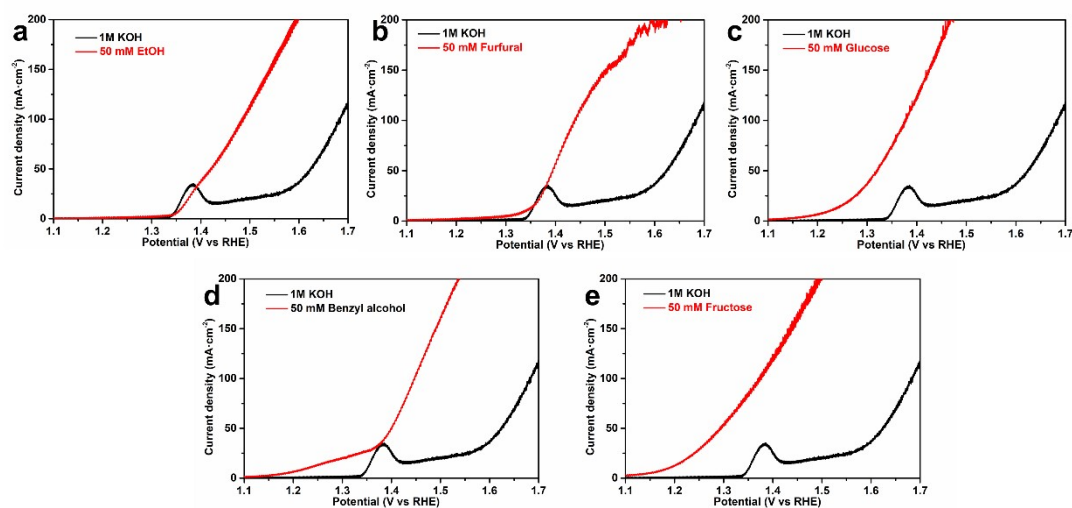

**Fig. S27** LSV curves of the 5%V-Ni<sub>3</sub>N in 1 M KOH with and without 50 mM ethanol, FF (furfural), glucose, BA (benzyl alcohol), fructose.

**Table S1** The conversion, FE, yield and production rate of 5%V-Ni<sub>3</sub>N at different potentials.

| Potential (V vs RHE) | Conversion | FE  | Yield | Production rate ( $\mu\text{mol cm}^{-2} \text{h}^{-1}$ ) |
|----------------------|------------|-----|-------|-----------------------------------------------------------|
| 1.375                | 98%        | 98% | 98%   | 139.3                                                     |
| 1.425                | 99%        | 99% | 99%   | 231.0                                                     |
| 1.475                | 100%       | 98% | 98%   | 403.1                                                     |
| 1.525                | 100%       | 95% | 96%   | 475.6                                                     |
| 1.575                | 91%        | 81% | 81%   | 489.7                                                     |

**Table S2** Comparisons of HMFOR electrocatalytic activity of 5%V-Ni<sub>3</sub>N to other reported electrocatalysts in 1 M KOH and 10 mM HMF.

| Electrode materials                                                  | Current density ( $\text{mA cm}^{-2}$ ) | Potential (V)  | Yield | FE    | Production rate ( $\mu\text{mol cm}^{-2} \text{h}^{-1}$ ) | Reference |
|----------------------------------------------------------------------|-----------------------------------------|----------------|-------|-------|-----------------------------------------------------------|-----------|
| 5%V-Ni <sub>3</sub> N                                                | 10<br>50                                | 1.342<br>1.387 | 98%   | 98%   | 403 (1.475 V <sup>a</sup> )                               | this work |
| Ni <sub>3</sub> N                                                    | 50                                      | 1.402          | 86%   | 80%   | 280 (1.475 V)                                             | this work |
| Ni <sub>3</sub> N@C                                                  | 50                                      | 1.38           | 98%   | 99%   |                                                           | 1         |
| V <sub>2</sub> O <sub>3</sub> -Ni <sub>3</sub> N                     | 10                                      | 1.47           | 96%   |       | 66                                                        | 2         |
| Ni <sub>2</sub> PNPA/NF                                              | 50                                      | 1.38           | 99%   | 99%   | 67 (1.423 V)                                              | 3         |
| NiSe@NiO <sub>x</sub>                                                | 50                                      | 1.36           | 99%   | 99%   | 100 (1.423 V)                                             | 4         |
| Co <sub>9</sub> S <sub>8</sub> -Ni <sub>3</sub> S <sub>2</sub> @NSOC | 10                                      | 1.33           | 98.8% | 98.6% | 105 (1.4 V)                                               | 5         |
| NiCoMn-LDHs                                                          | 50                                      | 1.61           | 91.7% | 70%   | 55 (1.5 V)                                                | 6         |
| Cu <sub>x</sub> S@NiCo-LDH                                           | 87                                      | 1.3            | 99%   | 99%   | 80 (1.32 V)                                               | 7         |
| Ni(OH) <sub>2</sub> -PO <sub>x</sub>                                 | 10                                      | 1.65           | 94.2% | 93.5% | 50 (1.464 V)                                              | 8         |
| CoO-CoSe <sub>2</sub>                                                | 50                                      | 1.4            | 99%   | 97.9% | 100 (1.43 V)                                              | 9         |
| MoO <sub>2</sub> -FeP                                                | 10                                      | 1.359          | 98.6% | 97.8% | 80 (1.424 V)                                              | 10        |
| NiCu NTs                                                             | 100                                     | 1.58           | 99%   | 96%   | 105 (1.424 V)                                             | 11        |



|                        |    |       |       |       |               |    |
|------------------------|----|-------|-------|-------|---------------|----|
| CF-Cu(OH) <sub>2</sub> | 20 | 1.523 | 98.7% | 98%   | 170 (1.723 V) | 12 |
| VN                     | 10 | 1.36  | 96%   | 84%   | 110           | 13 |
| Ni <sub>x</sub> B/NF   | 55 | 1.45  | 98.5% | 98.5% | 200 (1.45 V)  | 14 |

a: All the potentials are referred to RHE.

## References:

- [1] N. Zhang, Y. Zou, L. Tao, W. Chen, L. Zhou, Z. Liu, B. Zhou, G. Huang, H. Lin and S. Wang, *Angew. Chem., Int. Ed.*, 2019;58:15895-15903. <https://doi.org/10.1002/anie.201908722>
- [2] S. Liang, L. Pan, T. Thomas, B. Zhu, C. Chen, J. Zhang, H. Shen, J. Liu and M. Yang, *Chem. Eng. J.*, 2021, 415, 128864. <https://doi.org/10.1016/j.cej.2021.128864>
- [3] B. You, N. Jiang, X. Liu and Y. Sun, *Angew. Chem., Int. Ed.*, 2016;55:9913-9917. <https://doi.org/10.1002/anie.201603798>
- [4] L. Gao, Z. Liu, J. Ma, L. Zhong, Z. Song, J. Xu, S. Gan, D. Han and L. Niu, *Appl. Catal., B*, 2020;261:118235. <https://doi.org/10.1016/j.apcatb.2019.118235>
- [5] Y. Zhang, Z. Xue, X. Zhao, B. Zhang and T. Mu, *Green Chem.*, 2022;24:1721-1731. <https://doi.org/10.1039/D1GC04499K>
- [6] B. Liu, S. Xu, M. Zhang, X. Li, D. Decarolis, Y. Liu, Y. Wang, E. K. Gibson, C. R. A. Catlow and K. Yan, *Green Chem.*, 2021;23:4034-4043. <https://doi.org/10.1039/D1GC00901J>
- [7] X. Deng, X. Kang, M. Li, K. Xiang, C. Wang, Z. Guo, J. Zhang, X.-Z. Fu and J.-L. Luo, *J. Mater. Chem. A*, 2020;8:1138-1146. <https://doi.org/10.1039/C9TA06917H>
- [8] X. Xu, X. Song, X. Liu, H. Wang, Y. Hu, J. Xia, J. Chen, M. Shakouri, Y. Guo and Y. Wang, *ACS Sustain. Chem. Eng.*, 2022;10:5538-5547. <https://doi.org/10.1021/acssuschemeng.2c00121>
- [9] X. Huang, J. Song, M. Hua, Z. Xie, S. Liu, T. Wu, G. Yang and B. Han, *Green Chem.*, 2020;22:843-849. <https://doi.org/10.1039/C9GC03698A>
- [10] G. Yang, Y. Jiao, H. Yan, Y. Xie, A. Wu, X. Dong, D. Guo, C. Tian and H. Fu, *Adv. Mater.*, 2020;32:e2000455. <https://doi.org/10.1002/adma.202000455>
- [11] L. Zheng, Y. Zhao, P. Xu, Z. Lv, X. Shi and H. Zheng, *J. Mater. Chem. A*, 2022;10:10181-10191. <https://doi.org/10.1039/D2TA00579D>
- [12] X. Pang, H. Bai, H. Zhao, W. Fan and W. Shi, *ACS Catal.*, 2022;12:1545-1557. <https://doi.org/10.1021/acscatal.1c04880>
- [13] S. Li, X. Sun, Z. Yao, X. Zhong, Y. Cao, Y. Liang, Z. Wei, S. Deng, G. Zhuang, X. Li and J. Wang, *Adv. Funct. Mater.*, 2019;29:1807031. <https://doi.org/10.1002/adfm.201904780>
- [14] S. Barwe, J. Weidner, S. Cychy, D. M. Morales, S. Dieckhofer, D. Hiltrop, J. Masa, M. Muhler and W. Schuhmann, *Angew. Chem., Int. Ed.*, 2018;57:11460-11464. <https://doi.org/10.1002/anie.201806298>
